# Supplementary material
Source: Springer Nature journal article supplement (https://www.springermedizin.de/resource/supplementary/12936_2013_2808_MOESM4_ESM.pdf/9544316)

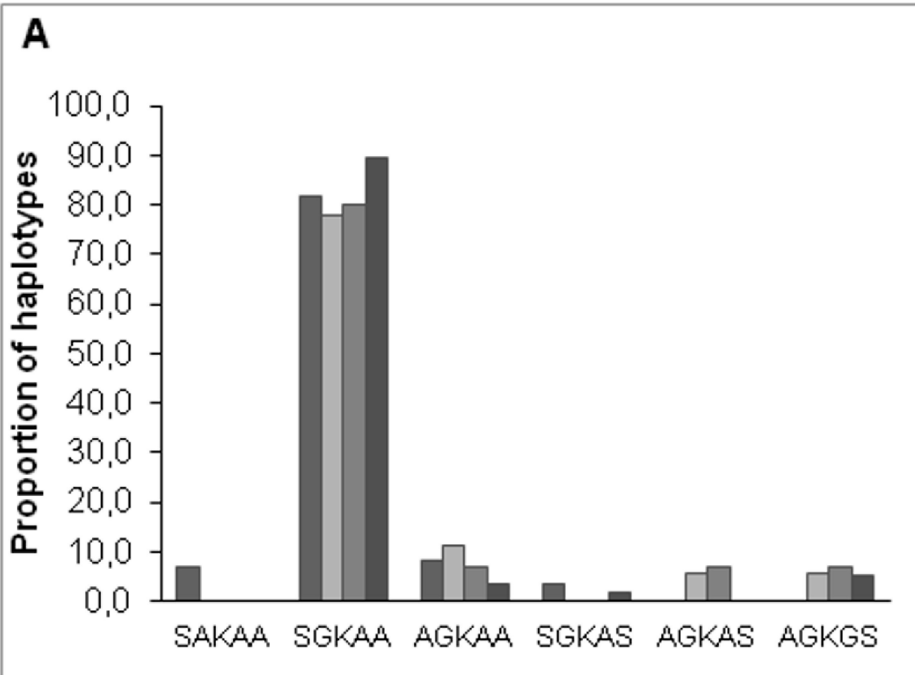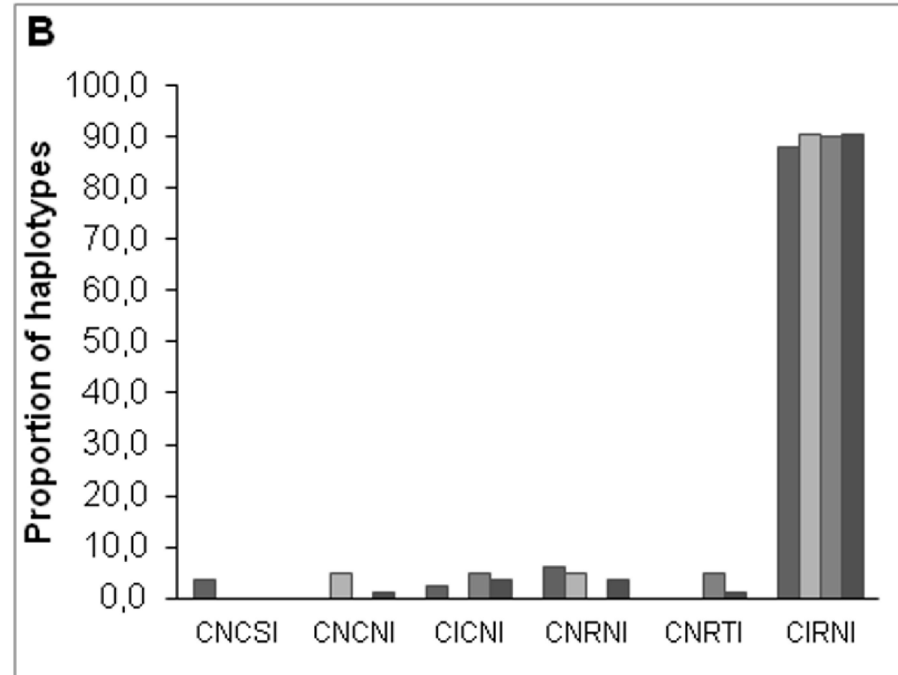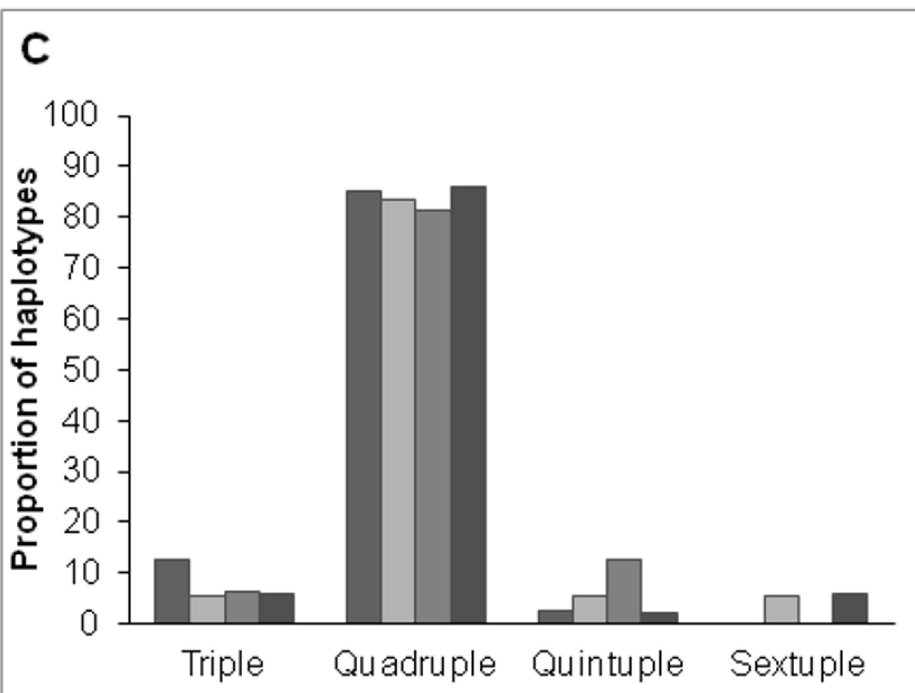

■ Early preg  
 ■ 2nd dose IPTp  
 ■ Post 2d dose  
 ■ Delivery

Supplement: MOESM4 [file 9544316]
